# Supplementary material for: Optimal use of tandem biotin and V5 tags in ChIP assays
Source: PubMed Central journal article supplement (PMC2644297; doi:10.1186/1471-2199-10-6), 2009-02-05

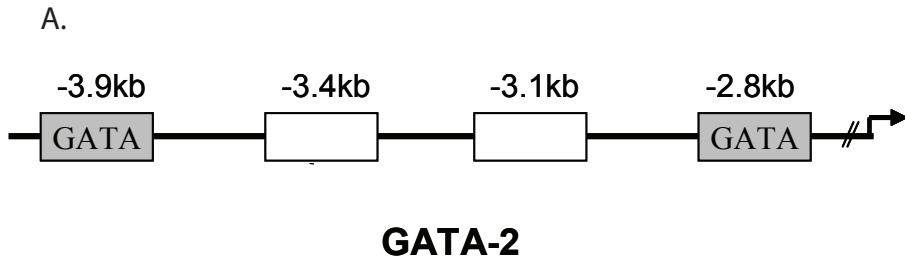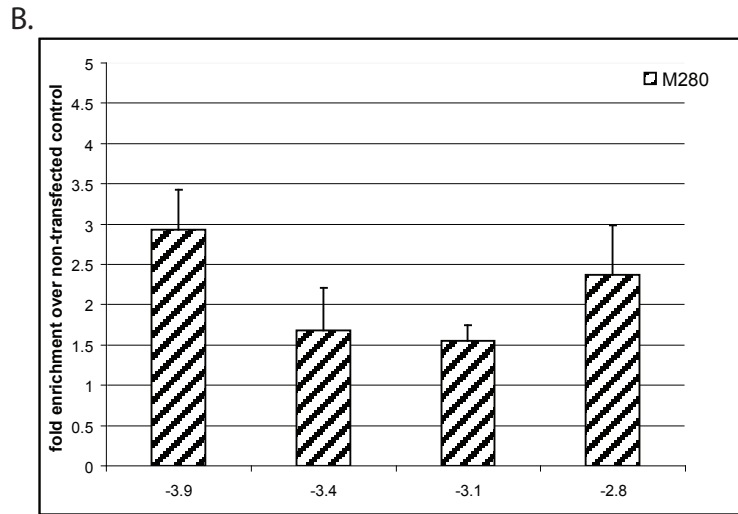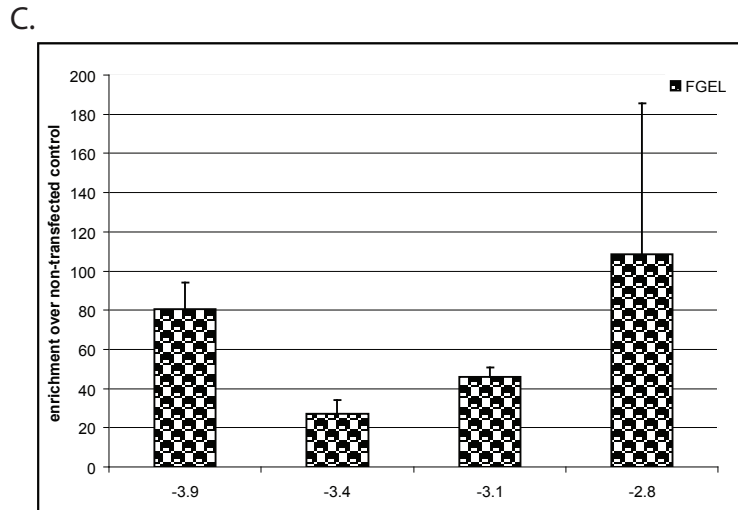

Supplement: 1471-2199-10-6-S2.pdf [file 1471-2199-10-6-S2.pdf]
